# Supplementary material
Source: PubMed Central journal article supplement (PMC9811511)
Supplement: NIHMS1842447-supplement-1.pdf [file NIHMS1842447-supplement-1.pdf]

463 **Supplementary Figure 1: Bar charts of treatment escalation and de-escalation between**  
 464 **visits.** BT, behavioral therapy; PT, pelvic floor physical therapy; OAB med, overactive bladder  
 465 medication.

466

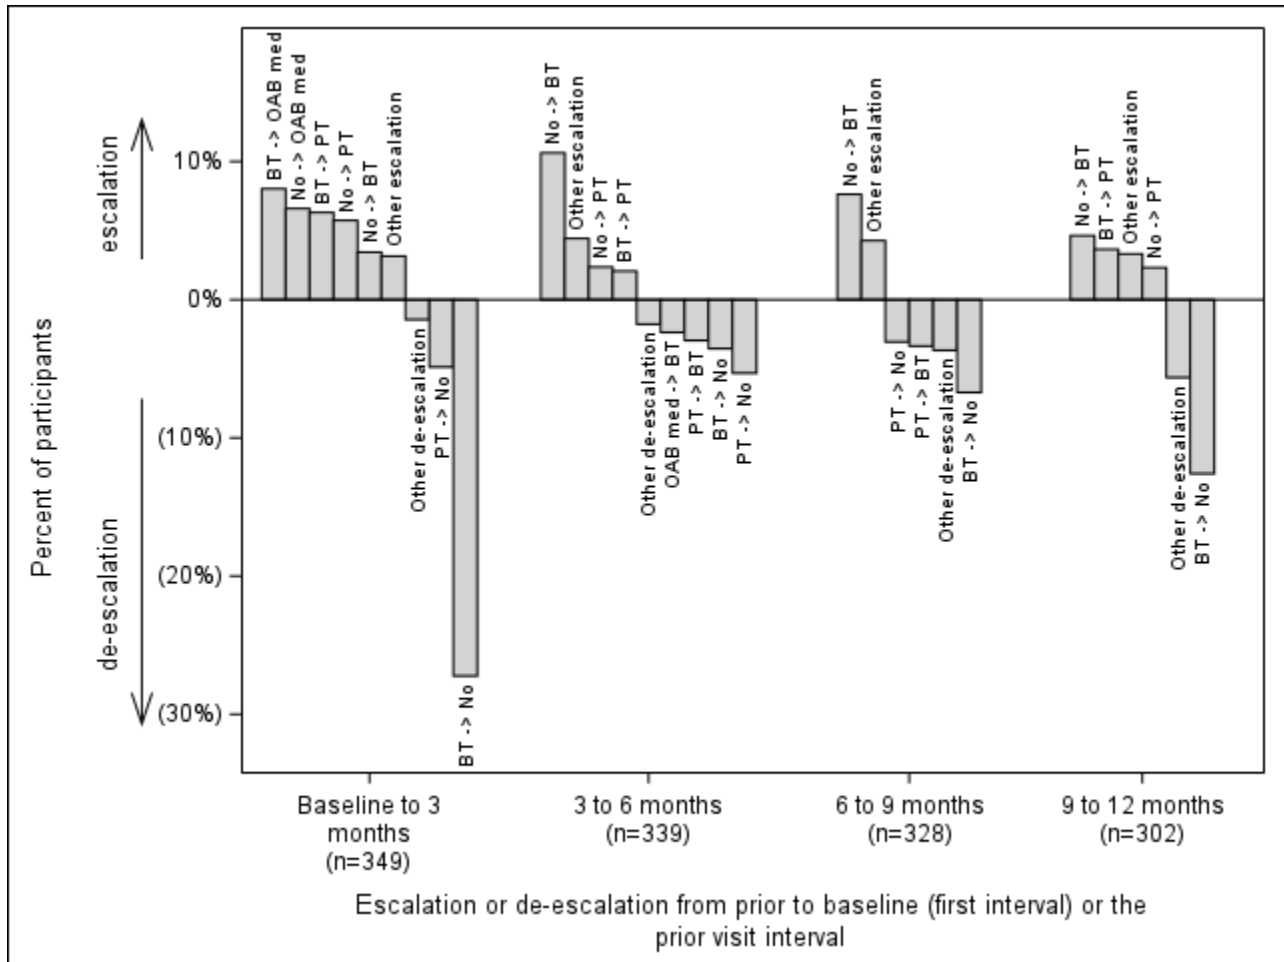

467  
 468  
 469

470

471 **Supplementary Table 1: Treatments included in behavioral therapy and overactive**  
 472 **bladder medications.**

| Treatment                     | Treatments Included                                                                                                                                                                                                                                                                                                                                                                                                                                          |
|-------------------------------|--------------------------------------------------------------------------------------------------------------------------------------------------------------------------------------------------------------------------------------------------------------------------------------------------------------------------------------------------------------------------------------------------------------------------------------------------------------|
| Overactive Bladder Medication | Darifenacin, Tolterodine, Oxybutynin, Trospium chloride, Solifenacin succinate, Festerodine fumerate, Mirabegron                                                                                                                                                                                                                                                                                                                                             |
| Behavioral Therapy            | Nutraceutical/Herbal Remedy, Kegel Exercises, Acupuncture, Yoga, Meditation, Counseling/Talk Therapy, Hypnosis, Biofeedback, Behavioral Modification, Intermittent Catheterization*, Indwelling Catheterization*, Bladder Reflex Training, Bladder Expression, Weight Loss, Reduced Fluid Consumption, Increased Fluid Consumption, Absorbent Pad or Undergarments, Pessary, Urethral Insert, Continuous Positive Airway Pressure, Exercise, Dietary Changes |

473

474 \*No participants at baseline were performing Intermittent Catheterization or required Indwelling  
 475 Catheterization

476 **Supplementary Table 2: Predictors of the highest level of treatment during 12-month**  
 477 **study follow-up. Results from ordinal logistic regression (proportional odds model).** BT,  
 478 behavioral therapy; PT, pelvic floor physical therapy; OAB med, overactive bladder medication;  
 479 HS, high school; GED, General Educational Development; ACB, anticholinergic burden score.

|                                                       | OR    | 95% CI<br>Lower | 95% CI<br>Upper | P-<br>value |
|-------------------------------------------------------|-------|-----------------|-----------------|-------------|
| Level of treatment as of baseline                     |       |                 |                 | <.0001      |
| 0 (ref)                                               |       |                 |                 |             |
| 1=BT                                                  | 0.74  | 0.47            | 1.18            | 0.207       |
| 2=PT                                                  | 0.99  | 0.49            | 2.01            | 0.970       |
| 3=OAB medication                                      | 7.76  | 3.24            | 18.58           | <.0001      |
| 4=Surgeries                                           | 14.55 | 2.08            | 101.77          | 0.007       |
| Had Sling before baseline                             | 0.70  | 0.37            | 1.31            | 0.264       |
| Education                                             |       |                 |                 | 0.070       |
| HS Diploma/GED or lower (ref)                         |       |                 |                 |             |
| Some college/tech school or Associates degree         | 1.77  | 0.93            | 3.37            | 0.082       |
| Bachelor's degree                                     | 1.08  | 0.54            | 2.14            | 0.830       |
| Graduate degree                                       | 1.87  | 0.91            | 3.84            | 0.089       |
| Hypertension                                          | 1.65  | 1.08            | 2.49            | 0.019       |
| Leaked urine in connection with a sudden need to rush | 1.32  | 1.10            | 1.59            | 0.003       |

|                                                          |      |      |      |       |
|----------------------------------------------------------|------|------|------|-------|
| to urinate (0=never to 4=almost always)                  |      |      |      |       |
| Stress urinary incontinence (0=never to 4=almost always) | 0.79 | 0.67 | 0.93 | 0.005 |
| ACB score at baseline                                    | 1.17 | 1.06 | 1.30 | 0.003 |

480

481

482

483

484

485

486

487

488

489

Notes: (1) Covariates level of treatment as of baseline and leaked urine in connection with a sudden need to rush to urinate were tested as violating the proportional odds assumption in the proportional odds model. Therefore, separate binary logistic regression models were performed by varying the cutoff of the outcome (see Supplementary Table 3 for results). Results from the unified proportional odds model were presented in the main results as the model performance between the unified proportional odds model and the separate binary logistic regression models did not seem to differ much. (2) Model results were similar in a sensitivity analysis that included only participants who completed the 12-month follow-up visit (n=302 [87%] out of 349 participants).

**Supplementary Table 3: Predictors of higher vs. lower level of treatment during 12-month study follow-up. Results from binary logistic regression models.** BT, behavioral therapy; PT, pelvic floor physical therapy; OAB med, overactive bladder medication; HS, high school; GED, General Educational Development; ACB, anticholinergic burden score.

|                                     | Level 1-4 vs. 0 |                    |                    |                 | Level 2-4 vs. 0-1 |                    |                    |                 | Level 3-4 vs. 0-2 |                    |                    |                 | Level 4 vs. 0-3 |                    |                    |                 |
|-------------------------------------|-----------------|--------------------|--------------------|-----------------|-------------------|--------------------|--------------------|-----------------|-------------------|--------------------|--------------------|-----------------|-----------------|--------------------|--------------------|-----------------|
|                                     | OR              | 95%<br>CI<br>Lower | 95%<br>CI<br>Upper | P-<br>val<br>ue | OR                | 95%<br>CI<br>Lower | 95%<br>CI<br>Upper | P-<br>val<br>ue | OR                | 95%<br>CI<br>Lower | 95%<br>CI<br>Upper | P-<br>val<br>ue | OR              | 95%<br>CI<br>Lower | 95%<br>CI<br>Upper | P-<br>val<br>ue |
| Level of treatment as of baseline * |                 |                    |                    | 0.866           |                   |                    |                    | 0.103           |                   |                    |                    | 0.540           |                 |                    |                    | 0.011           |
| 0 (ref)                             |                 |                    |                    |                 |                   |                    |                    |                 |                   |                    |                    |                 |                 |                    |                    |                 |
| 1=BT                                | 0.69            | 0.35               | 1.35               | 0.277           | 0.63              | 0.37               | 1.09               | 0.097           | 0.80              | 0.43               | 1.50               | 0.494           | 2.68            | 0.55               | 13.07              | 0.222           |
| 2=PT                                | 0.67            | 0.26               | 1.75               | 0.415           | 1.72              | 0.74               | 3.98               | 0.208           | 0.59              | 0.20               | 1.71               | 0.330           | 4.95            | 0.73               | 33.71              | 0.102           |
| 3=OAB medication                    | >999.999        | <0.001             | >999.999           | 0.961           | >999.999          | <0.001             | >999.999           | 0.965           | >999.999          | <0.001             | >999.999           | 0.965           | 6.37            | 1.09               | 37.35              | 0.040           |
| 4=Surgeries                         | >999.999        | <0.001             | >999.999           | 0.986           | >999.999          | <0.001             | >999.999           | 0.988           | 3.99              | 0.45               | 35.74              | 0.217           | 72.63           | 5.38               | 981.44             | 0.001           |
| Had Sling before baseline           | 0.89            | 0.37               | 2.16               | 0.802           | 0.85              | 0.39               | 1.86               | 0.689           | 0.39              | 0.12               | 1.26               | 0.116           | 0.72            | 0.14               | 3.87               | 0.705           |
| Education                           |                 |                    |                    | 0.0             |                   |                    |                    | 0.4             |                   |                    |                    | 0.2             |                 |                    |                    | 0.733           |

|                                                                                                    |      |      |       |           |      |      |      |           |      |      |      |           |      |      |      |           |
|----------------------------------------------------------------------------------------------------|------|------|-------|-----------|------|------|------|-----------|------|------|------|-----------|------|------|------|-----------|
|                                                                                                    |      |      |       | 27        |      |      |      | 45        |      |      |      | 70        |      |      |      | 32        |
| HS<br>Diploma/G<br>ED or<br>lower (ref)                                                            |      |      |       |           |      |      |      |           |      |      |      |           |      |      |      |           |
| Some<br>college/t<br>ech<br>school<br>or                                                           | 2.49 | 1.05 | 5.89  | 0.0<br>39 | 1.45 | 0.67 | 3.16 | 0.3<br>48 | 1.44 | 0.60 | 3.44 | 0.4<br>15 | 0.97 | 0.21 | 4.44 | 0.9<br>73 |
| Associat<br>es<br>degree                                                                           |      |      |       |           |      |      |      |           |      |      |      |           |      |      |      |           |
| Bachelo<br>r's degree                                                                              | 1.38 | 0.58 | 3.30  | 0.4<br>73 | 1.00 | 0.44 | 2.29 | 0.9<br>92 | 0.67 | 0.25 | 1.82 | 0.4<br>35 | 1.00 | 0.19 | 5.24 | 1.0<br>00 |
| Graduat<br>e degree                                                                                | 3.64 | 1.31 | 10.17 | 0.0<br>14 | 1.58 | 0.67 | 3.76 | 0.2<br>98 | 1.15 | 0.43 | 3.09 | 0.7<br>83 | 1.82 | 0.36 | 9.31 | 0.4<br>70 |
| Hypertensi<br>on                                                                                   | 1.52 | 0.82 | 2.82  | 0.1<br>89 | 1.62 | 0.97 | 2.70 | 0.0<br>64 | 2.07 | 1.16 | 3.70 | 0.0<br>14 | 2.04 | 0.78 | 5.31 | 0.1<br>46 |
| Leaked<br>urine in<br>connectio<br>n with a<br>sudden<br>need to<br>rush to<br>urinate<br>(0=never | 1.24 | 0.95 | 1.60  | 0.1<br>13 | 1.22 | 0.97 | 1.52 | 0.0<br>85 | 1.50 | 1.14 | 1.97 | 0.0<br>04 | 1.32 | 0.85 | 2.05 | 0.2<br>12 |

|                                                                            |      |      |      |       |      |      |      |       |      |      |      |       |      |      |      |       |  |
|----------------------------------------------------------------------------|------|------|------|-------|------|------|------|-------|------|------|------|-------|------|------|------|-------|--|
| to<br>4=almost<br>always) *                                                |      |      |      |       |      |      |      |       |      |      |      |       |      |      |      |       |  |
| Stress<br>urinary<br>incontinence<br>(0=never<br>to<br>4=almost<br>always) | 0.81 | 0.64 | 1.02 | 0.068 | 0.83 | 0.68 | 1.02 | 0.076 | 0.79 | 0.62 | 1.01 | 0.055 | 0.72 | 0.47 | 1.10 | 0.129 |  |
| ACB score<br>at<br>baseline                                                | 1.14 | 0.96 | 1.35 | 0.151 | 1.17 | 1.02 | 1.35 | 0.021 | 1.23 | 1.07 | 1.42 | 0.005 | 1.18 | 0.96 | 1.45 | 0.112 |  |

\* These covariates were tested as violating the proportional odds assumption in the ordinal logistic regression (proportional odds model) presented in Supplementary Table 2.
